# Supplementary material
Source: HighWire-hosted journal article supplement (https://gut.bmj.com/content/69/3/473)
Supplement: inline-supplementary-material-1 [file inline-supplementary-material-1.pdf]

**Table S1 Patient characteristics (fecal samples)**

|                                          |                                                                                                                                                       | Pre-pregnancy                                             | T1                                                       | T2                                                       | T3                                                     | Post-partum                                              |
|------------------------------------------|-------------------------------------------------------------------------------------------------------------------------------------------------------|-----------------------------------------------------------|----------------------------------------------------------|----------------------------------------------------------|--------------------------------------------------------|----------------------------------------------------------|
| Mean age at diagnosis (y, SD)            |                                                                                                                                                       | 22.6 (3.7)                                                |                                                          |                                                          |                                                        |                                                          |
| weeks pregnant at collection (SD)        |                                                                                                                                                       |                                                           | 10.3 (3)                                                 | 19.7 (3)                                                 | 31.9 (3.3)                                             |                                                          |
| IBD diagnosis (%)                        | CD<br>UC                                                                                                                                              | 15 (32.6)<br>31 (67.4)                                    |                                                          |                                                          |                                                        |                                                          |
| Disease location CD (Montreal) (%)       | L1 Ileal<br>L2 Colonic<br>L3 Ileocolonic                                                                                                              | 5 (16.1)<br>8 (25.8)<br>18 (58.1)                         |                                                          |                                                          |                                                        |                                                          |
| Disease behavior CD (Montreal) (%)       | B1 non structuring non penetrating<br>B2 Stricturing<br>B3 Penetrating<br>B2+B3 Stricturing and penetrating                                           | 23 (74.2)<br>2 (6.5)<br>4 (12.9)<br>2 (6.5)               |                                                          |                                                          |                                                        |                                                          |
| Disease extent UC/IBD-U (Montreal) (%)   | E1 Proctitis<br>E2 Left-sided colitis<br>E3 Pancolitis                                                                                                | 2 (13.3)<br>7 (46.7)<br>6 (40)                            |                                                          |                                                          |                                                        |                                                          |
| Median HBI for CD (IQR)                  |                                                                                                                                                       |                                                           | 1 (0-2.5)                                                | 0.5 (0-2)                                                | 0 (0-2.5)                                              |                                                          |
| Median SCCAI for UC/IBD-U (IQR)          |                                                                                                                                                       |                                                           | 1 (0-4)                                                  | 1 (0.5-4.5)                                              | 1 (0.5-1.5)                                            |                                                          |
| Median disease duration (y, IQR)         |                                                                                                                                                       | 5 (2-9)                                                   |                                                          |                                                          |                                                        |                                                          |
| IBD maintenance medication (monotherapy) | None<br>5-ASA<br>Steroids<br>Thiopurine<br>Ani-TNF/anti-integrin                                                                                      | 9 (109.6)<br>7 (15.2)<br>1 (2.2)<br>8 (17.4)<br>13 (28.3) | 11 (23.9)<br>4 (8.7)<br>1 (2.2)<br>7 (15.2)<br>12 (26.1) | 11 (23.9)<br>4 (8.7)<br>0<br>7 (15.2)<br>12 (26.1)       | 20 (43.5)<br>4 (8.7)<br>1 (2.2)<br>9 (19.6)<br>4 (8.7) | 10 (21.7)<br>6 (13)<br>0<br>7 (15.2)<br>12 (26.1)        |
| IBD maintenance medication (combination) | Anti-TNF + thiopurine<br>Anti-TNF + thopurine + 5-ASA<br>Anti-TNF + steroids<br>Anti-TNF + steroids + 5-ASA<br>Thiopurine + 5-ASA<br>5-ASA + steroids | 3 (6.5)<br>0<br>1 (2.2)<br>2 (4.3)<br>2 (4.3)<br>0        | 2 (4.3)<br>2 (4.3)<br>2 (4.3)<br>0<br>3 (6.5)<br>2 (4.3) | 2 (4.3)<br>2 (4.3)<br>2 (4.3)<br>0<br>3 (6.5)<br>2 (4.3) | 0<br>1 (2.2)<br>1 (2.2)<br>0<br>3 (6.5)<br>2 (4.3)     | 2 (4.3)<br>2 (4.3)<br>2 (4.3)<br>0<br>3 (6.5)<br>2 (4.3) |
| IBD surgery (%)                          | Bowel resection<br>Perianal surgery<br>Pouch                                                                                                          | 6 (13)<br>2 (4.3)<br>1. (2.2)                             |                                                          |                                                          |                                                        |                                                          |

|           |              |         |          |        |         |         |
|-----------|--------------|---------|----------|--------|---------|---------|
|           | Appendectomy | 1 (2.2) |          |        |         |         |
| Flare (%) |              | 3 (6.5) | 5 (10.9) | 6 (13) | 3 (6.5) | 3 (6.5) |

CD: Crohn's disease; UC: ulcerative colitis; SD: standard deviation; IQR: interquartile range; y: years; IBD: inflammatory bowel disease; HBI: Harvey Bradshaw index; SCCAI: simple clinical colitis activity index; TNF: tumor necrosis factor; ASA: aminosalicic acid;

**Table S2 Patient characteristics (serum samples)**

|                                          |                                                                                                                                                       | Pre-pregnancy                                | T1                                             | T2                                           | T3                                          | Post-partum                                  |
|------------------------------------------|-------------------------------------------------------------------------------------------------------------------------------------------------------|----------------------------------------------|------------------------------------------------|----------------------------------------------|---------------------------------------------|----------------------------------------------|
| Mean age at diagnosis (y, SD)            |                                                                                                                                                       | 22.8 (4.9)                                   |                                                |                                              |                                             |                                              |
| weeks pregnant at collection (SD)        |                                                                                                                                                       |                                              | 8.4 (2.1)                                      | 21.1 (2.6)                                   | 32 (3)                                      |                                              |
| IBD diagnosis (%)                        | CD<br>UC                                                                                                                                              | 8 (24.2)<br>25 (75.8)                        |                                                |                                              |                                             |                                              |
| Disease location CD (Montreal) (%)       | L1 Ileal<br>L2 Colonic<br>L3 Ileocolonic                                                                                                              | 2 (8)<br>11 (44)<br>12 (48)                  |                                                |                                              |                                             |                                              |
| Disease behavior CD (Montreal) (%)       | B1 non structuring non penetrating<br>B2 Stricturing<br>B3 Penetrating<br>B2+B3 Stricturing and penetrating                                           | 16 (64)<br>2 (8)<br>3 (12)<br>4 (16)         |                                                |                                              |                                             |                                              |
| Disease extent UC/IBD-U (Montreal) (%)   | E1 Proctitis<br>E2 Left-sided colitis<br>E3 Pancolitis                                                                                                | 1 (12.5)<br>3 (37.5)<br>4 (50)               |                                                |                                              |                                             |                                              |
| Median HBI for CD (IQR)                  |                                                                                                                                                       |                                              | 3 (1-5.5)                                      | 1 (0-3.5)                                    | 1 (0-2.5)                                   |                                              |
| Median SCCAI for UC/IBD-U (IQR)          |                                                                                                                                                       |                                              | 4 (0.505.5)                                    | 4 (0-5)                                      | 1 (1-2)                                     |                                              |
| Median disease duration (y, IQR)         |                                                                                                                                                       | 6.6 (4.8)                                    |                                                |                                              |                                             |                                              |
| IBD maintenance medication (monotherapy) | None<br>5-ASA<br>Thiopurine<br>Ani-TNF/anti-integrin                                                                                                  | 3 (9.1)<br>7 (21.1)<br>3 (9.1)<br>15 (45.5)  | 6 (18.2)<br>5 (15.2)<br>2 (6.2)<br>15 (45.5)   | 6 (18.2)<br>5 (15.2)<br>2 (6.1)<br>16 (48.5) | 18 (54.5)<br>5 (15.2)<br>3 (9.1)<br>3 (9.1) | 6 (18.2)<br>5 (15.2)<br>2 (6.1)<br>16 (48.5) |
| IBD maintenance medication (combination) | Anti-TNF + thiopurine<br>Anti-TNF + thopurine + 5-ASA<br>Anti-TNF + steroids<br>Anti-TNF + steroids + 5-ASA<br>Thiopurine + 5-ASA<br>5-ASA + steroids | 1 (3)<br>2 (6.1)<br>1 (3)<br>1 (3)<br>0<br>0 | 1 (3)<br>1 (3)<br>1 (3)<br>0<br>1 (3)<br>1 (3) | 1 (3)<br>0<br>1(3)<br>0<br>1 (3)<br>1 (3)    | 0<br>1 (3)<br>1 (3)<br>0<br>1 (3)<br>1 (3)  | 2 (3)<br>0<br>1 (3)<br>0<br>1 (3)<br>1 (3)   |
| IBD surgery (%)                          | Bowel resection<br>Perianal surgery<br>Pouch<br>Appendectomy                                                                                          | 5 (15.2)<br>4 (12.1)<br>1 (3)<br>0           |                                                |                                              |                                             |                                              |

|           |  |          |          |          |         |         |
|-----------|--|----------|----------|----------|---------|---------|
| Flare (%) |  | 4 (12.1) | 6 (18.2) | 6 (15.2) | 3 (9.1) | 2 (6.1) |
|-----------|--|----------|----------|----------|---------|---------|

CD: Crohn's disease; UC: ulcerative colitis; SD: standard deviation; IQR: interquartile range; y: years; IBD: inflammatory bowel disease; HBI: Harvey Bradshaw index; SCCAI: simple clinical colitis activity index; TNF: tumor necrosis factor; ASA: aminosalicic acid;
